# Supplementary material for: Insoluble and Soluble Dietary Fibers from Kiwifruit (Actinidia deliciosa) Modify Gut Microbiota to Alleviate High-Fat Diet and Streptozotocin-Induced TYPE 2 Diabetes in Rats
Source: MDPI journal article supplement (doi:10.3390/nu14163369), 2022-08-17
Supplement: s1 [file s1]

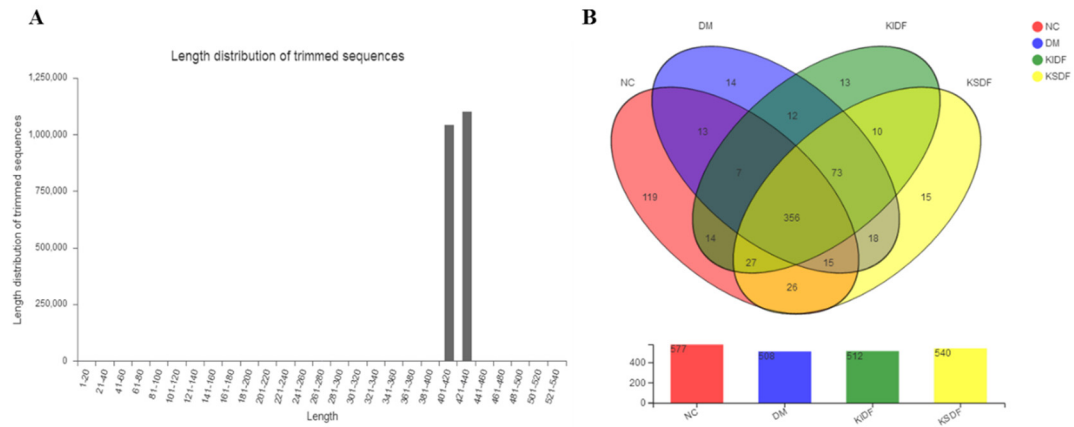

**Figure S1.** DNA raw data and Comparison of the OTUs in the four groups. The number of observed OTUs sharing >97% nucleotide sequence identity. **(A)** DNA sequencing number and length; **(B)** A Venn diagram was generated to describe the common and unique OTUs among the normal control group (NC, n = 6), diabetes model group (DM, n = 6), kiwifruit insoluble dietary fiber treatment group (KIDF, n=6) and kiwifruit soluble dietary fiber treatment group (KSDF, n = 6).

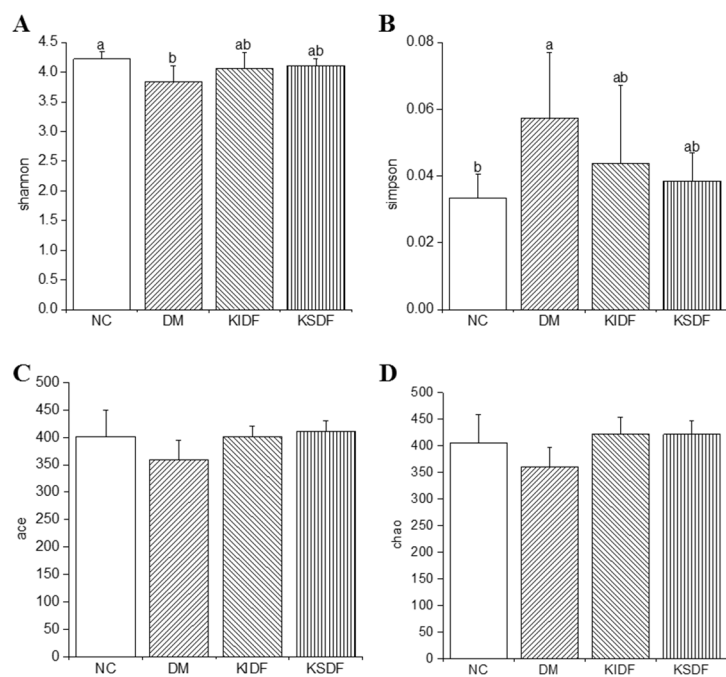

**Figure S2.** Effects of KIDF and KSDF on the community richness and diversity of gut microbiota in mice: **(A)** the shannon index; **(B)** the simpson index; **(C)** the ace index; **(D)** the chao index. Normal control group, NC; diabetes model group, DM; kiwifruit insoluble dietary fiber treatment group, KIDF; kiwifruit soluble dietary fiber treatment group, KSDF. The diverse letters represent significant difference ( $p < 0.05$ ).

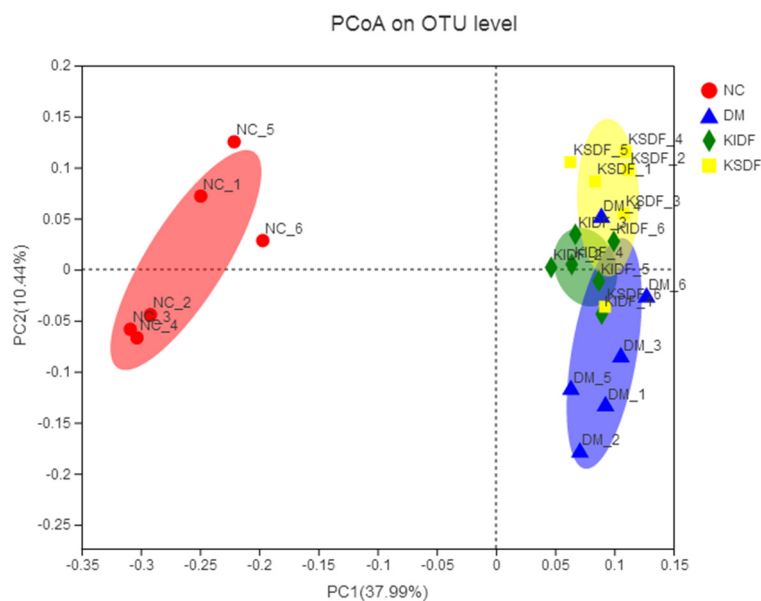

**Figure S3.** Effects on the gut microbiota structure by beta diversity metric using unsupervised multivariate statistical methods with principal coordinate analysis (PCoA) among the normal control group (NC, n = 6), diabetes model group (DM, n = 6), kiwifruit insoluble dietary fiber treatment group (KIDF, n=6) and kiwifruit soluble dietary fiber treatment group (KSDF, n = 6).

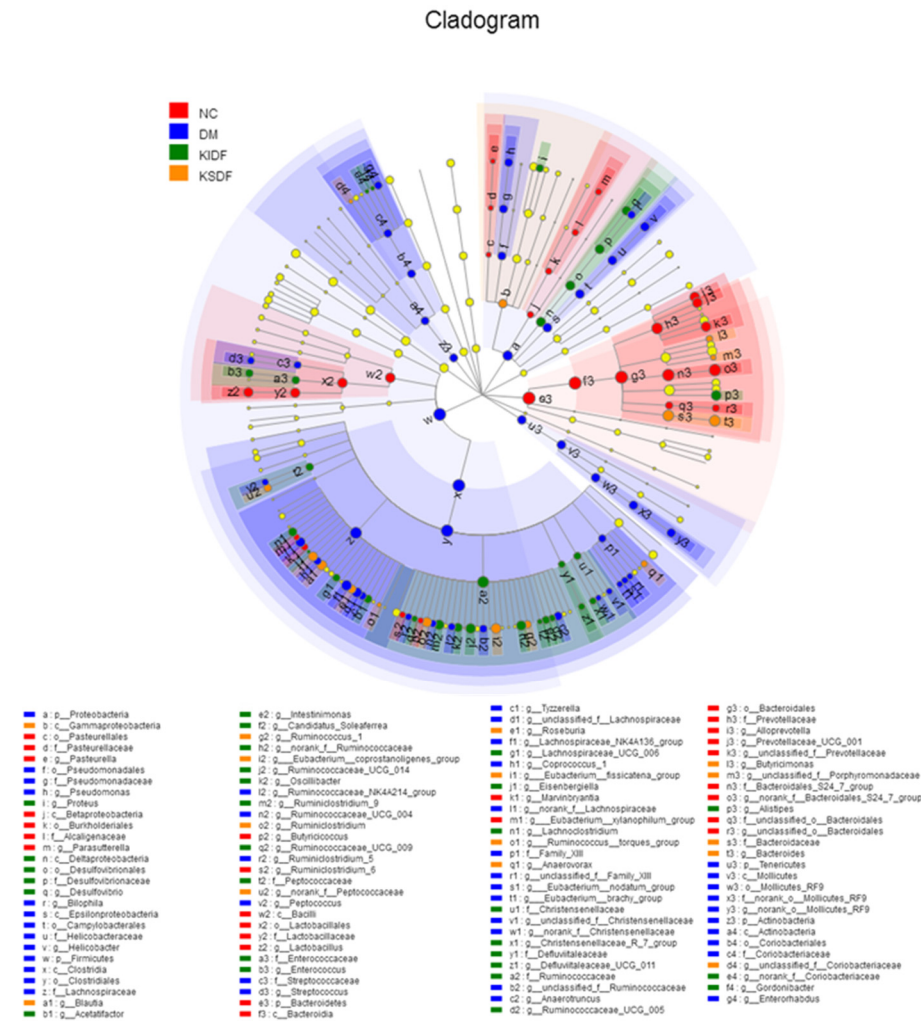

**Figure S4.** The significantly different species were determined based on the LEfSe method using the nonparametric factorial Kruskal-Wallis rank sum test at a significance level of 0.05. LEfSe taxonomy cladogram: different colors suggest enrichment of certain taxa in control group (NC, green, n = 6), metformin (MET, red, n = 6), and pumpkin polysaccharide (PPS; blue, n = 6). The size of the circles is based on relative abundance.

**Table S1.** Monosaccharide composition of KSDF and KIDF.

| %                 | KSDF       | KIDF       |
|-------------------|------------|------------|
| Rhamnose          | 3.76±0.13  | 3.01±0.23  |
| Fucose            | 17.11±0.78 | 9.82±0.15  |
| Arabinose         | 5.23±0.72  | 9.31±0.39  |
| Xylose            | 16.11±0.47 | 36.35±0.96 |
| Mannose           | 4.76±0.16  | 3.09±0.14  |
| Glucose           | 4.73±0.46  | 24.59±0.3  |
| Galactose         | 24.49±0.22 | 6.59±0.41  |
| Galacturonic acid | 23.81±0.28 | 7.24±0.28  |

All data are presented in the manner of means  $\pm$  SD (n = 3). KSDF, kiwifruit soluble dietary fiber; KIDF, kiwifruit insoluble dietary fiber.

**Table S2.** Ingredients and energy densities of experimental diets.

| Ingredients           | D12450J |       | D12492 |       |
|-----------------------|---------|-------|--------|-------|
|                       | g%      | kcal% | g%     | kcal% |
| Casein                | 0.190   | 0.198 | 0.258  | 0.198 |
| L-cystine             | 0.003   | 0.003 | 0.004  | 0.003 |
| Sucrose               | 0.336   | 0.351 | 0.094  | 0.072 |
| Corn starch           | 0.299   | 0.312 | -      | -     |
| Lodex 10 sugar        | 0.033   | 0.035 | 0.162  | 0.124 |
| Cellulose             | 0.047   | 0.000 | 0.065  | 0.000 |
| Soybean oil           | 0.024   | 0.056 | 0.032  | 0.056 |
| Lard                  | 0.019   | 0.045 | 0.317  | 0.547 |
| Mineral mixture       | 0.047   | 0.000 | 0.065  | 0.000 |
| Hydrocholine tartrate | 0.002   | 0.000 | 0.003  | 0.000 |
| Vitamin mixture       | 0.001   | 0.000 | 0.001  | 0.000 |
| Dye                   | 0.000   | 0.000 | 0.000  | 0.000 |
| Energy (kcal/g diet)  | 3.82    |       | 5.21   |       |

**Table S3.** Component of the PCR reaction system.

| Component             | Volume                                     |
|-----------------------|--------------------------------------------|
| 5×FastPfu buffer      | 4 µL                                       |
| 2.5 mM dNTPs          | 2 µL                                       |
| forward primer (5 µM) | 0.8 µL                                     |
| reverse primer (5 µM) | 0.8 µL                                     |
| BSA                   | 0.2 µL                                     |
| FastPfu polymerase    | 0.4 µL                                     |
| DNA template          | 10 ng                                      |
| Total volume          | 20 µL (With ddH <sub>2</sub> O complement) |

**Table S4.** Correlation of key communities of gut microbiota and biochemical parameters in NC, DM, KIDF and KSDF groups.

| Taxon                               | Spearman' correlation R |          |               |          |         |         |         |             |                |              |                 |                 |              |             |
|-------------------------------------|-------------------------|----------|---------------|----------|---------|---------|---------|-------------|----------------|--------------|-----------------|-----------------|--------------|-------------|
|                                     | Glu                     | HOMA-IR  | TNF- $\alpha$ | IL-6     | TG      | TC      | LDL     | Acetic acid | Propionic acid | Butyric acid | Isobutyric acid | Isovaleric acid | Valeric acid | Total SCFAs |
| Enterorhabdus                       | 0.54**                  | 0.43*    | 0.55**        | 0.68***  | 0.48*   | 0.55**  | 0.65*** | -0.28       | -0.13          | -0.38        | -0.35           | -0.48*          | -0.22        | -0.4        |
| Bacteroides                         | 0.52**                  | 0.57**   | 0.42*         | 0.45*    | 0.28    | 0.39    | 0.42*   | -0.6**      | -0.01          | -0.04        | -0.63***        | -0.42*          | -0.12        | -0.32       |
| Butyricimonas                       | 0.04                    | 0.07     | 0.17          | 0.07     | 0.13    | -0.01   | 0.15    | -0.54**     | -0.18          | 0.2          | -0.46*          | -0.52**         | -0.21        | -0.26       |
| Alloprevotella                      | -0.66***                | -0.68*** | -0.65***      | -0.62**  | -0.51*  | -0.61** | -0.51*  | 0.47*       | -0.07          | 0.52**       | 0.39            | 0.33            | -0.06        | 0.44*       |
| Prevotellaceae_UCG-001              | -0.57**                 | -0.54**  | -0.57**       | -0.55**  | -0.62** | -0.54** | -0.59** | 0.45*       | 0.18           | 0.24         | 0.56**          | 0.35            | -0.12        | 0.42*       |
| Alistipes                           | -0.51*                  | -0.50*   | -0.54**       | -0.66*** | -0.36   | -0.44*  | -0.39   | 0.09        | 0              | 0.5*         | 0.38            | -0.16           | 0.27         | 0.25        |
| Enterococcus                        | 0.39                    | 0.31     | 0.50*         | 0.38     | 0.47*   | 0.45*   | 0.36    | -0.22       | -0.08          | -0.39        | -0.24           | -0.59**         | 0.2          | -0.39       |
| Lactobacillus                       | -0.35                   | -0.28    | -0.16         | -0.16    | -0.25   | -0.16   | -0.39   | 0.59**      | 0.35           | -0.02        | 0.23            | 0.58**          | 0.16         | 0.49*       |
| Streptococcus                       | 0.64***                 | 0.64***  | 0.70***       | 0.68***  | 0.63*** | 0.59**  | 0.54**  | -0.45*      | 0.04           | -0.52**      | -0.49*          | -0.58**         | -0.13        | -0.47*      |
| Christensenellaceae_R-7_group       | 0.46*                   | 0.46*    | 0.20          | 0.34     | 0.18    | 0.37    | 0.41*   | -0.47*      | -0.31          | 0.05         | -0.33           | -0.43*          | -0.19        | -0.35       |
| Defluviitaleaceae_UCG-011           | 0.48*                   | 0.39     | 0.36          | 0.42*    | 0.32    | 0.42*   | 0.58**  | -0.47*      | -0.26          | -0.21        | -0.24           | -0.63***        | -0.13        | -0.48*      |
| Eubacterium_xylanophilum_group      | -0.32                   | -0.29    | -0.36         | -0.36    | -0.47*  | -0.39   | -0.45*  | 0.25        | 0.07           | 0.23         | 0.38            | 0.47*           | 0.16         | 0.32        |
| Blautia                             | 0.41*                   | 0.37     | 0.40          | 0.43*    | 0.38    | 0.62**  | 0.39    | 0.02        | 0.07           | -0.09        | -0.45*          | -0.51*          | 0.34         | -0.06       |
| Coprococcus_1                       | 0.49*                   | 0.35     | 0.54**        | 0.52**   | 0.37    | 0.36    | 0.53**  | -0.26       | -0.22          | -0.22        | -0.19           | -0.41*          | -0.2         | -0.39       |
| Lachnospiraceae_NK4A136_group       | 0.53**                  | 0.58**   | 0.59**        | 0.59**   | 0.62**  | 0.67*** | 0.55**  | -0.51*      | -0.31          | -0.2         | -0.47*          | -0.62**         | 0.24         | -0.47*      |
| Marvinbryantia                      | 0.24                    | 0.39     | 0.67***       | 0.43*    | 0.44*   | 0.46*   | 0.25    | -0.3        | -0.02          | -0.33        | -0.48*          | -0.08           | 0.18         | -0.3        |
| Marvinbryantia                      | -0.40                   | -0.30    | -0.16         | -0.25    | -0.15   | -0.14   | -0.38   | 0.3         | -0.13          | -0.15        | 0.47*           | 0.5*            | 0.03         | 0.03        |
| Roseburia                           | 0.53**                  | 0.59**   | 0.34          | 0.39     | 0.35    | 0.37    | 0.37    | -0.62**     | -0.12          | 0.16         | -0.54**         | -0.59**         | 0.11         | -0.23       |
| Tyzzereella                         | 0.51*                   | 0.6**    | 0.59**        | 0.53**   | 0.65*** | 0.69*** | 0.39    | -0.43*      | -0.29          | -0.14        | -0.77***        | -0.45*          | 0.23         | -0.37       |
| Peptococcus                         | 0.53**                  | 0.54**   | 0.72***       | 0.62**   | 0.52**  | 0.71*** | 0.55**  | -0.42*      | -0.14          | -0.44*       | -0.58**         | -0.51*          | 0.22         | -0.5*       |
| Eubacterium_coprostanoligenes_group | -0.10                   | -0.13    | -0.32         | -0.24    | -0.41*  | -0.21   | -0.08   | 0.05        | 0.22           | 0.53**       | -0.08           | -0.18           | -0.03        | 0.35        |
| Butyricicoccus                      | -0.40                   | -0.38    | -0.41*        | -0.46*   | -0.35   | -0.35   | -0.43*  | 0.65***     | 0.29           | 0.23         | 0.35            | 0.58**          | 0.29         | 0.53**      |
| Intestinimonas                      | 0.6**                   | 0.58**   | 0.55**        | 0.53**   | 0.57**  | 0.61**  | 0.45*   | -0.5*       | -0.24          | -0.1         | -0.48*          | -0.75***        | 0.19         | -0.39       |
| Oscillibacter                       | 0.57**                  | 0.61**   | 0.48*         | 0.49*    | 0.51*   | 0.54**  | 0.48*   | -0.57**     | -0.15          | -0.05        | -0.62**         | -0.69***        | 0.24         | -0.34       |
| Ruminiclostridium_6                 | -0.19                   | -0.12    | -0.16         | -0.20    | -0.19   | 0.01    | -0.25   | 0.19        | -0.14          | 0.5*         | -0.2            | -0.06           | 0.22         | 0.26        |



|                |         |          |         |         |         |          |        |        |       |        |         |          |       |        |
|----------------|---------|----------|---------|---------|---------|----------|--------|--------|-------|--------|---------|----------|-------|--------|
| Ruminococcus_1 | -0.41*  | -0.46*   | -0.41*  | -0.43*  | -0.42*  | ‘-0.50*  | -0.49* | 0.37   | 0     | 0.49*  | 0.16    | 0.1      | -0.09 | 0.4    |
| Parasutterella | -0.59** | -0.66*** | -0.58** | -0.56** | -0.59** | -0.73*** | -0.48* | 0.43*  | 0.05  | 0.28   | 0.65*** | 0.57**   | -0.21 | 0.38   |
| Bilophila      | 0.72*** | 0.75***  | 0.61**  | 0.74*** | 0.70*** | 0.55**   | 0.59** | -0.48* | -0.19 | -0.41* | -0.53** | -0.23    | -0.21 | -0.51* |
| Desulfovibrio  | 0.42*   | 0.37     | 0.46*   | 0.35    | 0.35    | 0.43*    | 0.41*  | -0.35  | -0.07 | -0.23  | -0.3    | -0.68*** | 0.06  | -0.37  |
| Helicobacter   | 0.54**  | 0.59**   | 0.52**  | 0.50*   | 0.52**  | 0.51*    | 0.41*  | -0.3   | -0.09 | -0.17  | -0.58** | -0.27    | 0.16  | -0.32  |

\*Spearman’s correlation is significantly different at a level of 0.05; \*\* Spearman’s correlation is significantly different at a level of 0.01; \*\*\* Spearman’s correlation is significantly different at a level of 0.001. For the limited table, only the significant Spearman’s correlation R values were showed.

**Table S5.** Correlation of SCFAs and biochemical parameters in NC, DM, KIDF and KSDF groups.

| name            | Glu      | HOMA-<br>IR | TNF- $\alpha$ | IL-6     | TG       | TC       | LDL      |
|-----------------|----------|-------------|---------------|----------|----------|----------|----------|
| Acetic_acid     | -0.59**  | -0.69***    | -0.53**       | -0.55**  | -0.57**  | -0.43*   | -0.58**  |
| Propionic_acid  | -0.26    | -0.27       | -0.23         | -0.22    | -0.47*   | -0.31    | -0.22    |
| Butyric_acid    | -0.51*   | -0.48*      | -0.68***      | -0.69*** | -0.64*** | -0.6**   | -0.59**  |
| Isobutyric_acid | -0.46*   | -0.62**     | -0.63**       | -0.57**  | -0.57**  | -0.56**  | -0.45*   |
| Isovaleric_acid | -0.42*   | -0.39       | -0.34         | -0.33    | -0.32    | -0.39    | -0.41*   |
| Valeric_acid    | -0.2     | -0.08       | -0.06         | -0.26    | -0.05    | 0.15     | -0.25    |
| Total_SCFAs     | -0.65*** | -0.65***    | -0.7***       | -0.7***  | -0.82*** | -0.65*** | -0.68*** |

\*Spearman's correlation is significantly different at a level of 0.05; \*\* Spearman's correlation is significantly different at a level of 0.01; \*\*\* Spearman's correlation is significantly different at a level of 0.001. For the limited table, only the significant Spearman's correlation R values were showed.
